# Supplementary material for: High Levels of Circulating Type II Collagen Degradation Marker (CTx-II) Are Associated with Specific VDR Polymorphisms in Patients with Adult Vertebral Osteochondrosis
Source: MDPI journal article supplement (doi:10.3390/ijms18102073), 2017-09-29
Supplement: s1 [file s1]

# Supplementary materials: High Levels of Circulating Type II Collagen Degradation Marker (CTx-II) are Associated with Specific *VDR* Polymorphisms in Patients with Adult Vertebral Osteochondrosis

Sabina Cauci, Marco Viganò <sup>2</sup>, Laura de Girolamo, Paola De Luca, Carlotta Perucca Orfei, Giuseppe Banfi, Giovanni Lombardi, Marco Brayda-Bruno and Alessandra Colombini

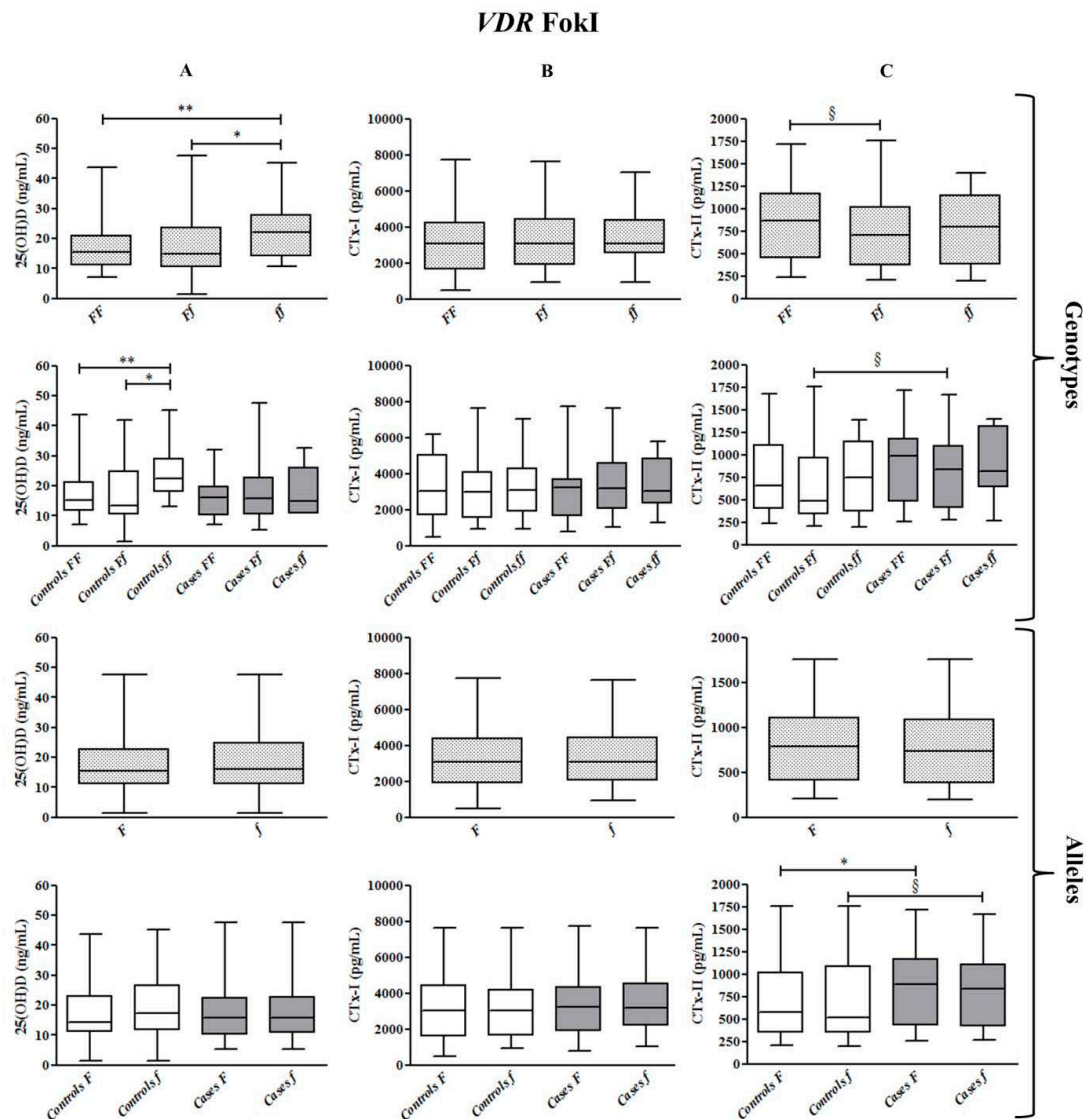

**Figure S1.** 25hydroxyvitamin D (25(OH)D) (A), cross-linked C-telopeptides of type I collagen (CTx-I) (B) and cross-linked C-telopeptides of type II collagen (CTx-II) (C) plasma concentrations in all subjects (light grey plots) and in all controls (white plots) and all cases (deep grey plots), distributed according to FokI *VDR* genotypes/alleles. The box and whisker plots show the median, 25th and 75th percentile (interquartile) (the box) and minimum and maximum value (the whiskers).

\*  $p < 0.05$ . \*\*  $p < 0.01$ . § indicates a tendency.

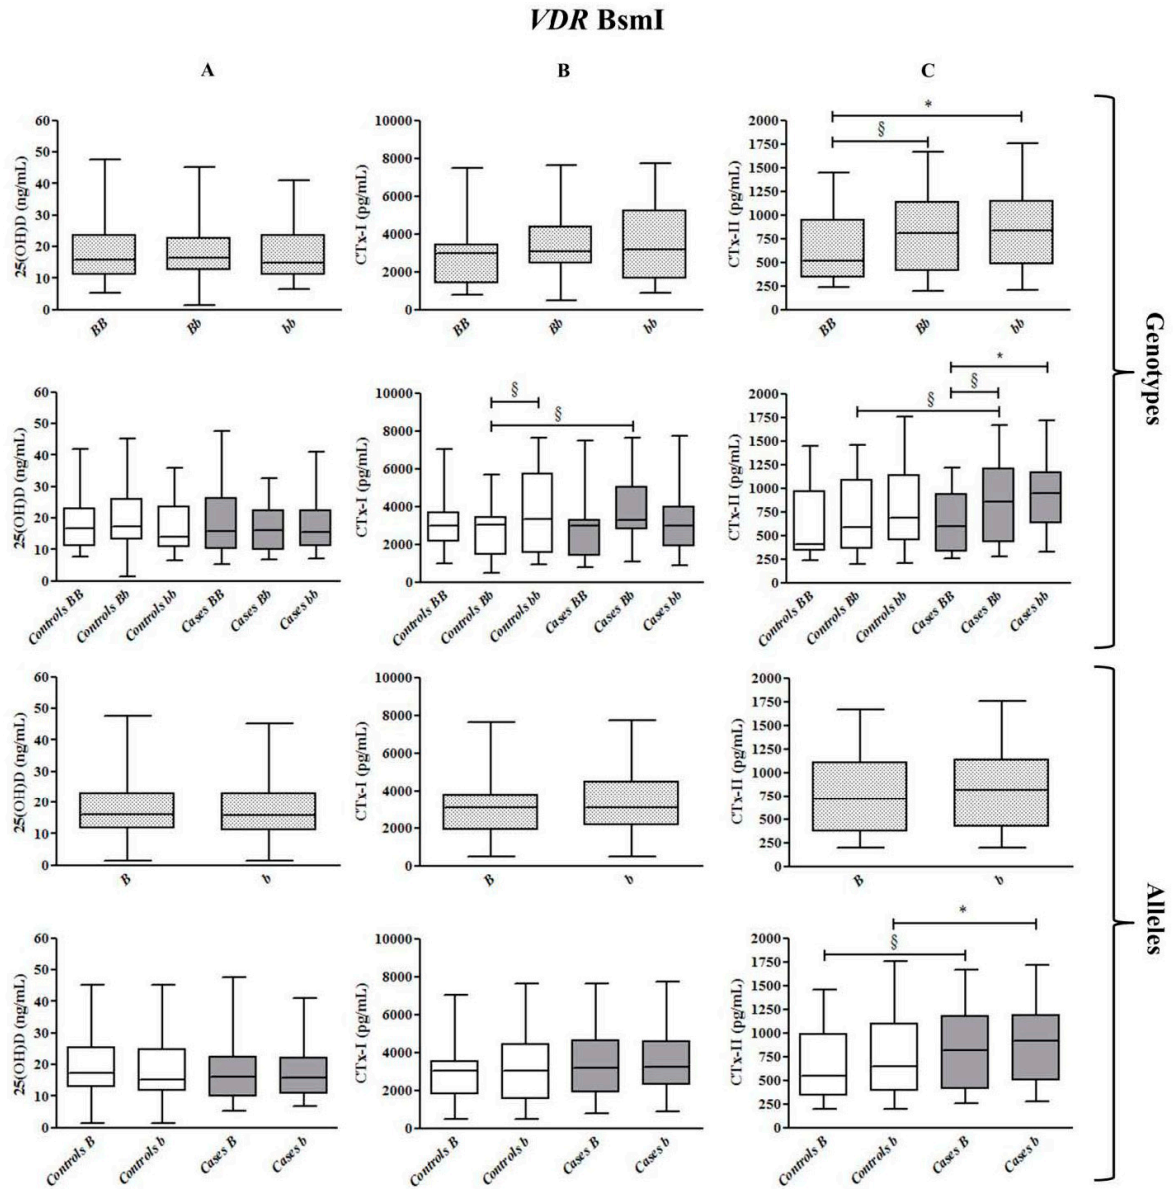

**Figure S2.** 25hydroxyvitamin D (25(OH)D) (A), cross-linked C-telopeptides of type I collagen (CTx-I) (B) and cross-linked C-telopeptides of type II collagen (CTx-II) (C) plasma concentrations in all subjects (light grey plots) and in all controls (white plots) and all cases (deep grey plots), distributed according to BsmI VDR genotypes/alleles. The box and whisker plots show the median, 25th and 75th percentile (interquartile) (the box) and minimum and maximum value (the whiskers).  
 \*  $p < 0.05$ . § indicates a tendency.

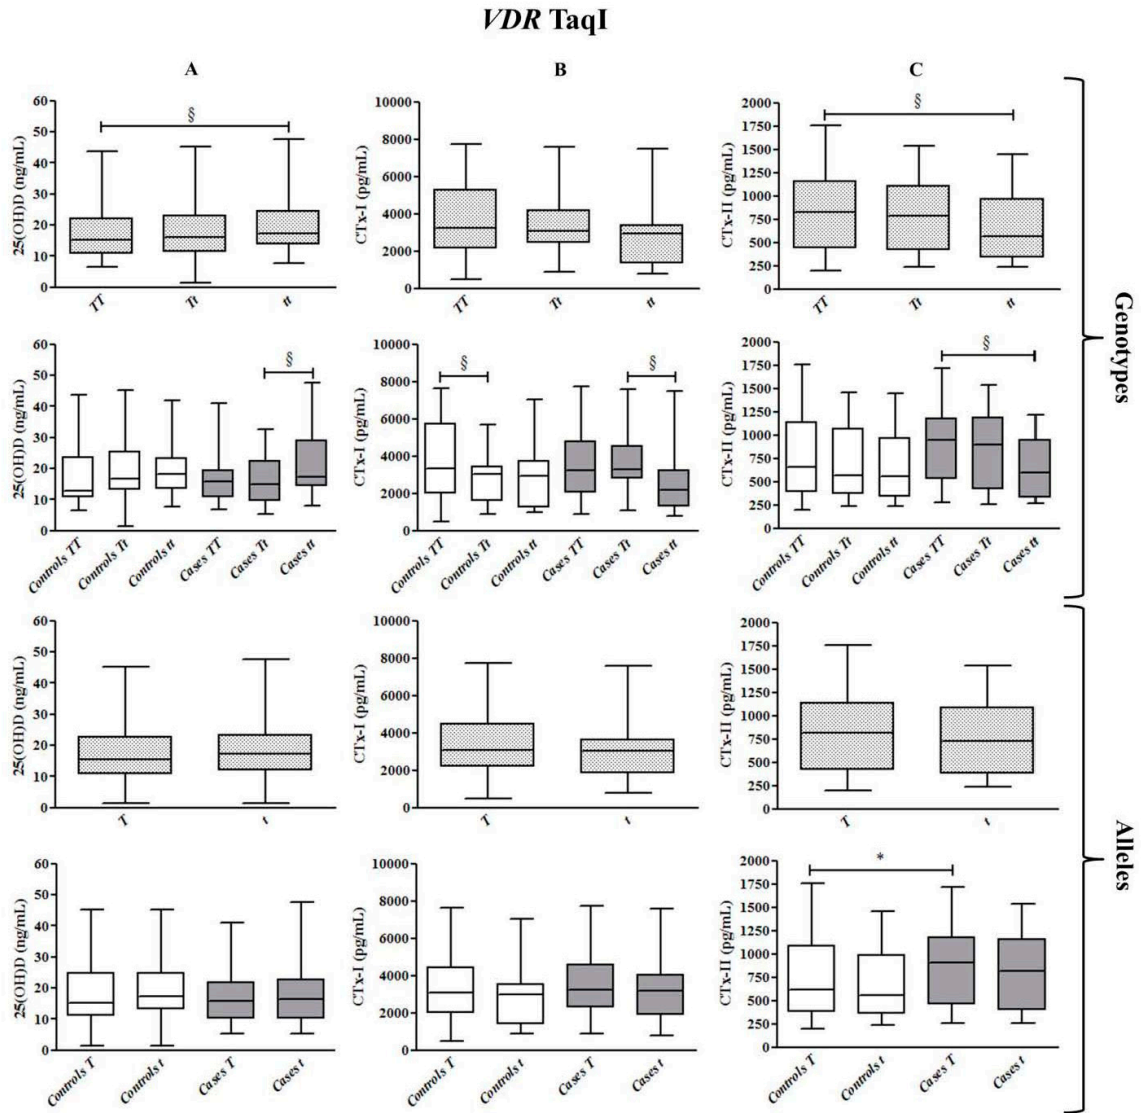

**Figure S3.** 25hydroxyvitamin D (25(OH)D) (A), cross-linked C-telopeptides of type I collagen (CTx-I) (B) and cross-linked C-telopeptides of type II collagen (CTx-II) (C) plasma concentrations in all subjects (light grey plots) and in all controls (white plots) and all cases (deep grey plots), distributed according to TaqI *VDR* genotypes/alleles. The box and whisker plots show the median, 25th and 75th percentile (interquartile) (the box) and minimum and maximum value (the whiskers).

\*  $p < 0.05$ . § indicates a tendency.

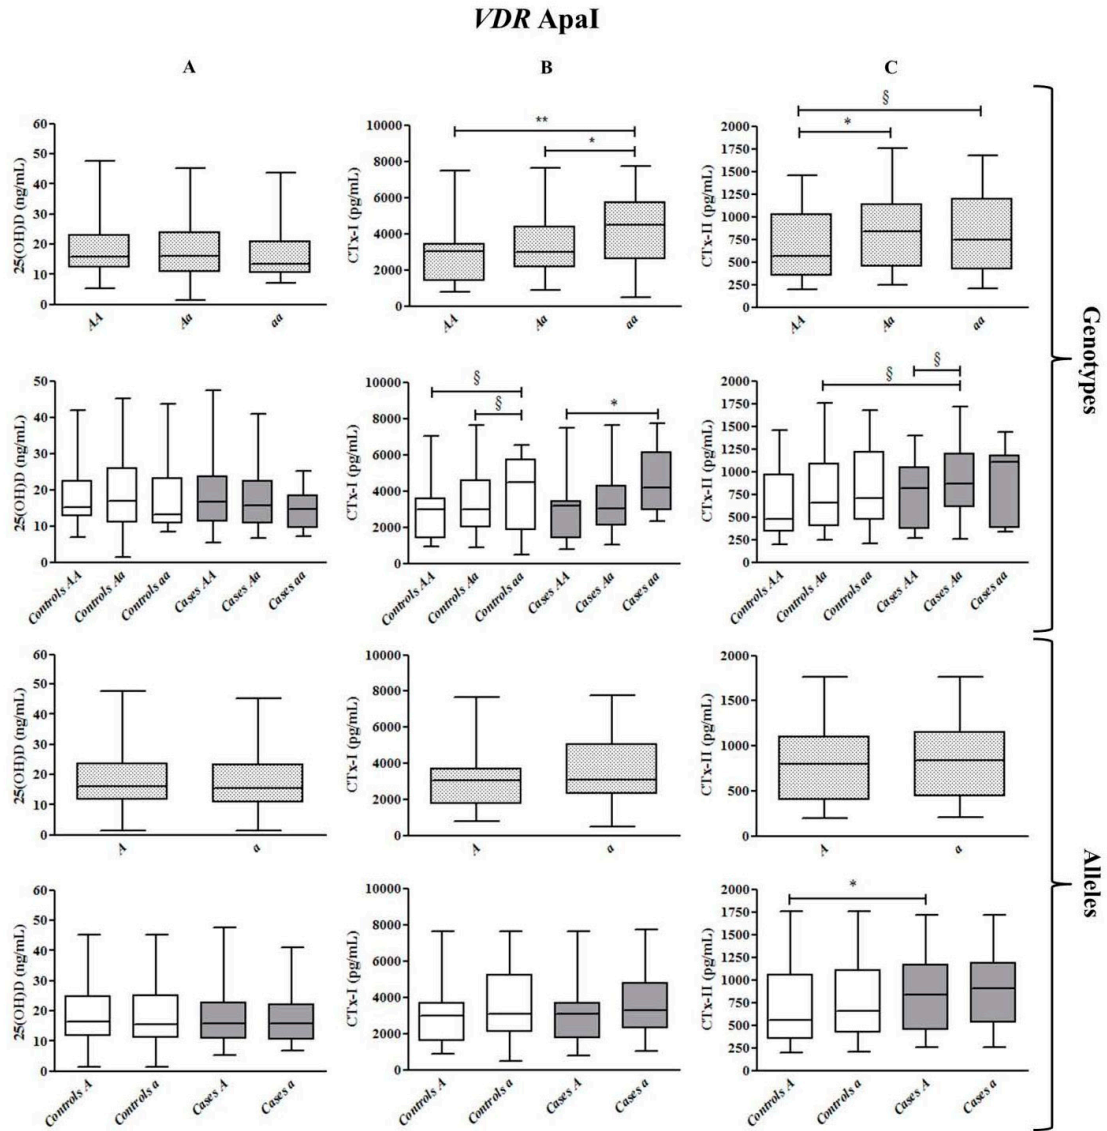

**Figure S4.** 25hydroxyvitamin D (25(OH)D) (A), cross-linked C-telopeptides of type I collagen (CTx-I) (B) and cross-linked C-telopeptides of type II collagen (CTx-II) (C) plasma concentrations in all subjects (light grey plots) and in all controls (white plots) and all cases (deep grey plots), distributed according to ApaI *VDR* genotypes/alleles. The box and whisker plots show the median, 25th and 75th percentile (interquartile) (the box) and minimum and maximum value (the whiskers). \*  $p < 0.05$ . \*\*  $p < 0.01$ . § indicates a tendency.
